# Supplementary material for: Artificial Intelligence Applied to in vitro Gene Expression Testing (IVIGET) to Predict Trivalent Inactivated Influenza Vaccine Immunogenicity in HIV Infected Children
Source: PubMed Central journal article supplement (PMC7569088; doi:10.3389/fimmu.2020.559590), 2020-10-05

**a**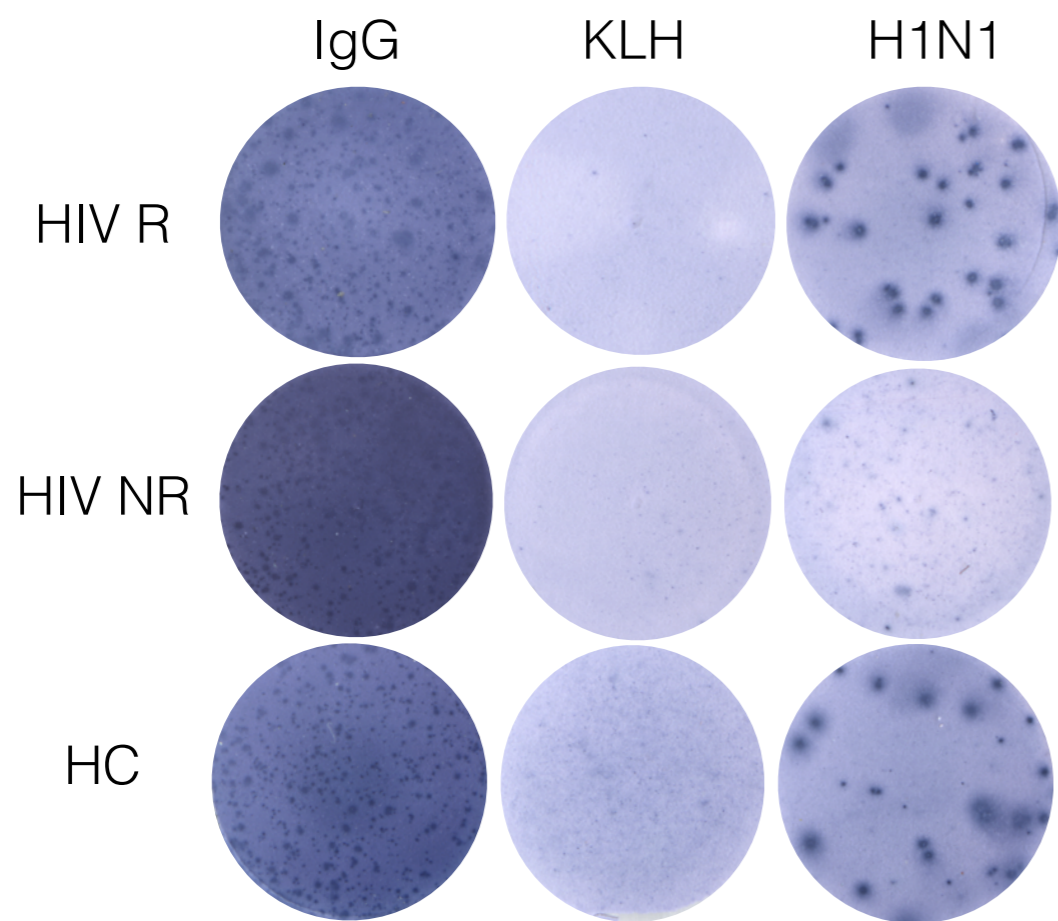**b**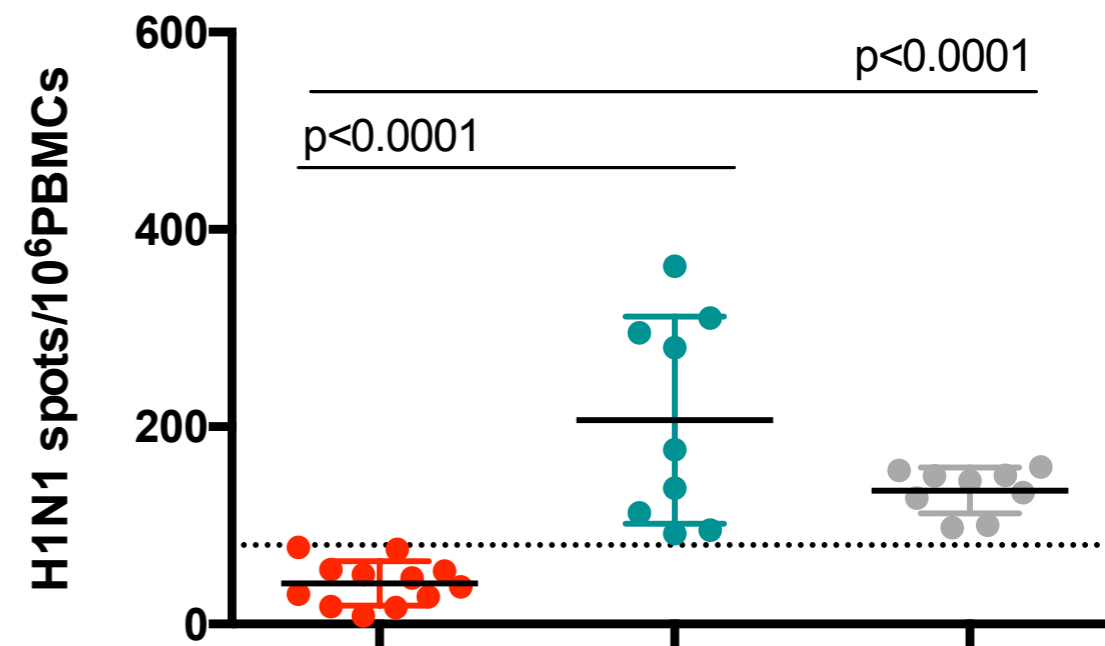

Supplement: Image_1.pdf [file Image_1.pdf]
